1 **Potential spreading risks and disinfection challenges of medical**  
2 **wastewater by the presence of Severe Acute Respiratory Syndrome**  
3 **Coronavirus 2 (SARS-CoV-2) viral RNA in septic tanks of fangcang**  
4 **hospital**

5 Dayi Zhang<sup>1,\*</sup>, Haibo Ling<sup>2</sup>, Xia Huang<sup>1</sup>, Jing Li<sup>3</sup>, Weiwei Li<sup>2</sup>, Chuan Yi<sup>2</sup>, Ting  
6 Zhang<sup>3</sup>, Yongzhong Jiang<sup>3</sup>, Yuning He<sup>4</sup>, Songqiang Deng<sup>4</sup>, Xian Zhang<sup>1</sup>, Yi Liu<sup>1</sup>,  
7 Guanghe Li<sup>1</sup>, Jiuhui Qu<sup>1,5,\*</sup>

8 1. School of Environment, Tsinghua University, Beijing 100084, P.R. China

9 2. Hubei Academy of Environmental Sciences, Wuhan 430072, P.R. China

10 3. Hubei Center for Disease Control and Prevention, Wuhan 430079, P.R. China

11 4. Research Institute for Environmental Innovation (Tsinghua-Suzhou), Suzhou  
12 215163, P.R. China

13 5. Key Laboratory of Drinking Water Science and Technology, Research Center for  
14 Eco-Environmental Sciences, Chinese Academy of Sciences, Beijing 100085, P.R.  
15 China

16

17 **Corresponding author**

18 Dr Dayi Zhang

19 School of Environment, Tsinghua University, Beijing 100084, P.R. China

20 Email: [zhangdayi@tsinghua.edu.cn](mailto:zhangdayi@tsinghua.edu.cn)

21 Tel: +86(0)10-62773232; Fax: +86(0)10-62795687

22 Prof Jiuhui Qu

23 School of Environment, Tsinghua University, Beijing 100084, P.R. China

24 Email: [jhqu@tsinghua.edu.cn](mailto:jhqu@tsinghua.edu.cn)

25 Tel: +86(0)10-62849151; Fax: +86(0)10-62795687

26

27 **Abstract**

28 The outbreak of coronavirus infectious disease-2019 (COVID-19) pneumonia raises  
29 the concerns of effective deactivation of the severe acute respiratory syndrome  
30 coronavirus 2 (SARS-CoV-2) in medical wastewater by disinfectants. In this study,  
31 we evaluated the presence of SARS-CoV-2 viral RNA in septic tanks of Wuchang  
32 Fangcang Hospital and found their unexpected occurrence after disinfection with  
33 sodium hypochlorite. Embedded viruses in faeces particles might be released in septic  
34 tanks, behaving as a source of SARS-CoV-2 and potentially contributing to its spread  
35 through drainage pipelines. Current recommended disinfection strategy (free chlorine  
36 above 6.5 mg/L after 1.5-hour contact) needs to be reevaluated to completely remove  
37 SARS-CoV-2 viral RNA in non-centralized disinfection system and effectively  
38 deactivate SARS-CoV-2. The effluents showed negative results for SARS-CoV-2 viral  
39 RNA when overdosed with sodium hypochlorite but had high a level of disinfection  
40 by-product residuals, possessing significant ecological risks.

41

## 42 1. Introduction

43 The outbreak of coronavirus infectious disease-2019 (COVID-19) pneumonia since  
44 2019 is caused by the severe acute respiratory syndrome coronavirus 2 (SARS-CoV-2)  
45 <sup>1-3</sup> and it has rapidly spread throughout 202 countries around the world. Till 28<sup>th</sup> April  
46 2020, there are over 3 million confirmed cases and over 200,000 deaths globally, and  
47 the number is still increasing rapidly. There is clear evidence of human-to-human  
48 transmission of SARS-CoV-2 <sup>2, 4-6</sup>. Besides direct contact and respiratory routes <sup>3, 7, 8</sup>,  
49 faecal transmission might be an alternative route owing to the presence and survival  
50 of SARS-CoV-2 in patient's faeces <sup>9-14</sup>. As municipal wastewater pipe network  
51 receives huge amounts of wastewater from residents and treated sewage from  
52 hospitals, SARS-CoV-2 from non- or inefficient-disinfected wastewater can persist for  
53 a prolonged time in pipe network, becoming a secondary spreading source. It brings  
54 urgent requirement and careful consideration of disinfection strategies to prevent  
55 SARS-CoV-2 from entering drainage pipe network.

56 Disinfection is of great importance to eliminate or deactivate pathogenic  
57 microorganisms. Traditional disinfection strategies include ultraviolet germicidal  
58 irradiation and biocidal agents, e.g., gaseous ozone, alcohol, formaldehyde, hydrogen  
59 peroxide, peroxyacetic acid, povidone iodine and chlorine-based disinfectant <sup>15-18</sup>.  
60 Chlorine-based disinfectants are widely used for their broad sterilization spectrum,  
61 high inactivation efficiency, low price, and easy decomposition with little residue <sup>19</sup>.  
62 Nevertheless, overuse of chlorine-based disinfectants brings concerns of disinfection  
63 by-products (DBPs) which are harmful to ecosystems and human health <sup>20-22</sup>. More  
64 than 600 kinds of DBPs have been observed <sup>23</sup>, such as trihalomethanes (THMs),  
65 haloacetic acids (HAAs), halogen acetonitriles (HANs), halonitromethanes (HNMs)  
66 and haloacetamides (HAcAms) <sup>24-27</sup>. For effective centralized disinfection, World  
67 Health Organization (WHO) has suggested free chlorine  $\geq 0.5$  mg/L after at least 30  
68 minutes of contact time at  $\text{pH} < 8.0$  <sup>28</sup>. Additionally, China has launched a guideline for  
69 emergency treatment of medical sewage containing SARS-CoV-2 on 1<sup>st</sup> February  
70 2020, requiring free chlorine of  $\geq 6.5$  mg/L and contact time of  $\geq 1.5$  hour in  
71 disinfection units <sup>29</sup>. Unfortunately, the performance of chlorine-based disinfectants  
72 on SARS-CoV-2 in real medical wastewater treatment system is not clear yet.

73 In this work, we studied the presence of SARS-CoV-2 viral RNA in septic tanks of

74 Wuchang Fangcang Hospital (Wuhan, China) to evaluate the disinfection performance  
75 and optimize disinfection strategies to prevent SARS-CoV-2 from spreading through  
76 drainage pipelines. Further analysis of DBPs evaluated the potential ecological risks  
77 in the effluents.

## 78 2. Materials and methods

### 79 2.1 Wuchang Fangcang Hospital and disinfection strategy

80 Wuchang Fangcang Hospital was open from 5<sup>th</sup> February to 10<sup>th</sup> March 2020,  
81 receiving 1124 COVID-19 patients (Figure 1). It had eight separate toilets and all  
82 sewage from toilets and showers were combined and disinfected in 4 preliminary  
83 disinfection tanks. They were then pumped into three septic tanks outside the hospital,  
84 followed a final disinfection (800 g/m<sup>3</sup> of sodium hypochlorite before March 5<sup>th</sup>).  
85 After 24-hour, the effluent was pumped and discharged into pipe network and  
86 wastewater treatment plants. After 5<sup>th</sup> March, the dosage of sodium hypochlorite was  
87 increased to 6700 g/m<sup>3</sup> to secure successful deactivation of SARS-CoV-2.

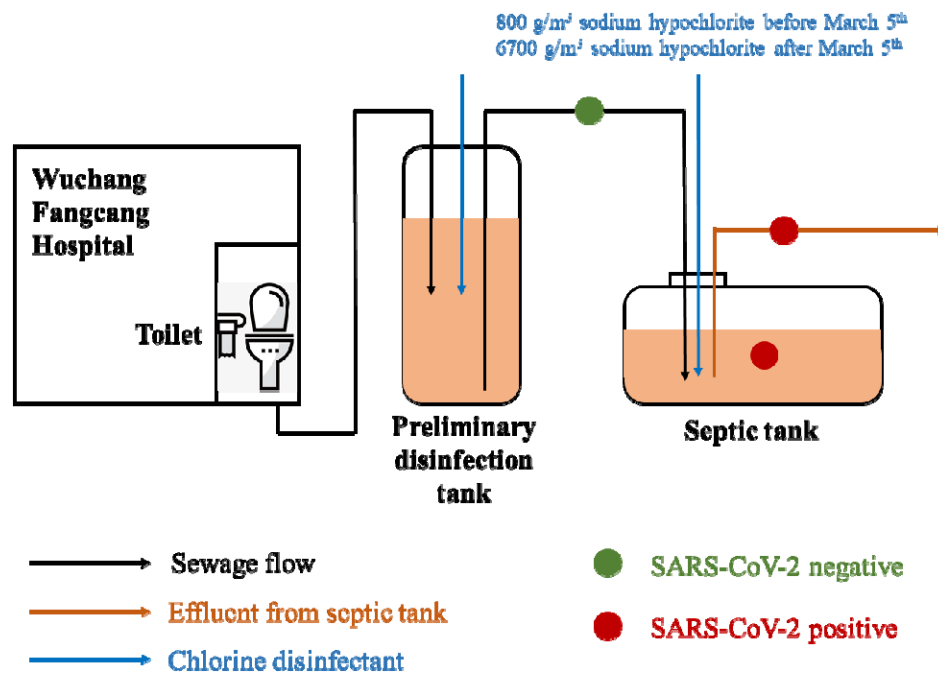

88

89 **Figure 1.** Schematic disinfection process of septic tanks of Wuchang Fangcang  
90 Hospital.

## 91 2.2 *Sampling and chemical analysis*

92 Influent and effluent samples were collected from septic tanks of Wuchang Fangcang  
93 Hospital on 26<sup>th</sup> February, 1<sup>st</sup> March and 10<sup>th</sup> March, 2020. Around 2.0 L of water was  
94 directly collected in a plexiglass sampler and transferred into a sterile plastic bag for  
95 biological analysis and a brown glass bottle for DBPs analysis. A stratified plexiglass  
96 sampler was used to obtain samples from different layers of septic tanks, designated  
97 as top-layer (0-50 cm) and bottom-layer (50-100 cm) water.

98 Free chlorine was measured on site using PCH58700-00 (HACH, USA). DBPs  
99 measurements were carried out on a GCMS-QP2020 (Shimadzu, Japan) equipped  
100 with Atomx purge and trap autosampler (Teledyne Tekmar, USA). The autosampler  
101 operating conditions were as follows: purge for 11 min at 30 °C with high-purity  
102 nitrogen gas at a flow rate of 40 mL/min, dry purge for 1.0 min at 20 °C with the  
103 flow rate of 40 mL/min, pre-desorption at 180 °C and desorption for 2.0 min at  
104 190 °C, and bake for 6.0 min at 200 °C.

## 105 2.3 *RNA extraction and PCR*

106 Water samples were firstly centrifuged at 3,000 rpm to remove suspended solids. The  
107 supernatant was subsequently supplemented with NaCl (0.3 mol/L) and PEG-6000  
108 (10%), settled overnight, and centrifuged at 10,000 g for 30 minutes. Viral RNA in  
109 pellets was extracted using the EZ1 virus Mini kit (Qiagen, Germany) according to  
110 the manufacturer's instructions. RNA of SARS-CoV-2 was detected using  
111 AgPath-ID™ One-Step RT-PCR Kit (Life Technologies, USA) on a LightCycler 480  
112 Real-time PCR platform (Roche, USA) in duplicates. Two target genes, open reading  
113 frame lab (CCDC-ORF1) and nucleocapsid protein (CCDC-N), were simultaneously  
114 amplified, following the detailed procedure described in Project of COVID-19  
115 Prevention and Control (Fifth Edition, China CDC). Cycle threshold (Ct) value of  $\leq 37$ ,  
116  $\geq 40$  and 37-40 is defined as positive, negative and suspected, respectively.

## 117 2.4 *Data analysis*

118 One-way ANOVA was used to compare the difference between samples and p-value  
119 less than 0.05 refers to significant difference.

### 120 3. Results and discussions

121 For all influents of septic tanks received from Wuchang Fangcang Hospital, there was  
 122 no positive result for SARS-CoV-2 viral RNA. On 26<sup>th</sup> February and 1<sup>st</sup> March, the  
 123 effluents were all positive for SARS-CoV-2 (100% for CDCC-N and 57.1% for  
 124 CDCC-ORF1, Table 1). Ct values ranged from 30.15 to 34.93 (CDCC-ORF1) and  
 125 30.69 to 35.67 (CCDC-N), respectively. Although there was no significant difference  
 126 between these two sampling days, Ct values of top-layer waters (ND-31.82 for  
 127 CDCC-ORF1 and 31.76-35.67 for CCDC-N) were significantly lower than those of  
 128 bottom-layer waters (30.15-34.93 for CDCC-ORF1 and 30.69-32.62 for CCDC-N,  
 129  $p=0.019$ ), indicating more SARS-CoV-2 in top-layer waters.

130 **Table 1.** Ct values of SARS-CoV-2 and free chlorine in the effluents of septic tanks of  
 131 Wuchang Fangcang Hospital.

| Dates                     | Samples         | Positive          | Ct                    |                    | Free chlorine (mg/L)* |
|---------------------------|-----------------|-------------------|-----------------------|--------------------|-----------------------|
|                           |                 |                   | CCDC-ORF1             | CDCC-N             |                       |
| 26 <sup>th</sup> February | Influent        | 0% (0/1)          | Negative              | Negative           | ND                    |
|                           | <b>Effluent</b> | <b>100% (1/1)</b> | <b>32.52</b>          | <b>31.03</b>       | <b>ND</b>             |
| 1 <sup>st</sup> March     | Influent        | 0% (0/1)          | Negative              | Negative           | ND                    |
|                           | <b>Effluent</b> | <b>100% (6/6)</b> | <b>Negative-30.15</b> | <b>30.69-35.67</b> | <b>ND</b>             |
| 10 <sup>th</sup> March    | Influent        | 0% (0/2)          | Negative              | Negative           | ND                    |
|                           | <b>Effluent</b> | <b>0% (0/2)</b>   | <b>Negative</b>       | <b>Negative</b>    | <b>21-25</b>          |

132 ND: not detectable. \*: free chlorine in septic tank 12-hour after sodium hypochlorite addition.

133 On 26<sup>th</sup> February and 1<sup>st</sup> March, free chlorine in the effluents was above 6.5 mg/L  
 134 after 1.5 hours contact with 800 g/m<sup>3</sup> of sodium hypochlorite, meeting well with the  
 135 guideline for emergency treatment of medical sewage containing SARS-CoV-2  
 136 suggested by China CDC. Twelve hours after sodium hypochlorite addition, free  
 137 chlorine declined to nondetectable (total chlorine 4.0-8.8 mg/L) and results for  
 138 SARS-CoV-2 viral RNA were positive (Table 1). It hinted an unexpected presence of  
 139 SARS-CoV-2 viral RNA after disinfection and a dosage of 800 g/m<sup>3</sup> of sodium  
 140 hypochlorite could not completely remove SARS-CoV-2 viral RNA in the effluents.  
 141 To improve disinfection performance and secure a complete deactivation of  
 142 SARS-CoV-2, the dosage of sodium hypochlorite was increased to 6700 g/m<sup>3</sup> since  
 143 6<sup>th</sup> March and free chlorine in the effluents on 10<sup>th</sup> March ranged from 21.0 to 25.0  
 144 mg/L at 12-hour after sodium hypochlorite addition. Eventually, both influents and

145 effluents of septic tanks were negative for SARS-CoV-2 viral RNA. However,  
146 trichlormethane, tribromomethane, bromodichloromethane and  
147 dibromochloromethane was 182-482, 0.6-3.1, 1.3-8.9 and ND-1.2  $\mu\text{g/L}$  in the  
148 effluents, respectively.

149 Our results suggested that disinfection in Wuchang Fangcang Hospital was  
150 satisfactory to deactivate SARS-CoV-2 in aqueous phase after 1.5-hour contact,  
151 owing to the absence of SARS-CoV-2 viral RNA. Addition of 800  $\text{g/m}^3$  of sodium  
152 hypochlorite according to the guideline for emergency treatment of medical sewage  
153 containing SARS-CoV-2 suggested by China CDC achieved free chlorine  $> 6.5 \text{ mg/L}$   
154 for 1.5 hours, but SARS-CoV-2 viral RNA was present in the effluents at 12-hour  
155 after sodium hypochlorite addition when free chlorine declined to nondetectable.  
156 SARS-CoV-2 in patients' faeces<sup>8, 13</sup> might explain the surprising presence of  
157 SARS-CoV-2 viral RNA in the effluents, that viruses embedded in faeces particles  
158 could escape from disinfection and slowly release into aqueous phase. Suspended  
159 particles as small as 7  $\mu\text{m}$  can protect viruses from UV exposure and dwindle their  
160 vulnerability to direct sunlight inactivation, and 0.3- $\mu\text{m}$  sized particles can shield  
161 viruses from disinfection for their prolonged survival<sup>30</sup>. As faeces are rich in organic  
162 compounds and form numerous suspended solids containing SARS-CoV-2, they are  
163 of high risk as the source releasing viruses in septic tanks. It is also evidenced by the  
164 lower Ct values of SARS-CoV-2 in upper-layer waters, explained by more faeces  
165 residuals and suspended solids in the bottom of septic tanks absorbing SARS-CoV-2  
166 from aquatic water. Thus, septic tanks might behave as a long-term source to release  
167 SARS-CoV-2 viral RNA into waters when disinfection is not completed and  
168 challenges public health through potentially spreading viruses in drainage pipelines.

169 The surprising presence of SARS-CoV-2 viral RNA after disinfection with sodium  
170 hypochlorite suggested that free chlorine  $> 0.5 \text{ mg/L}$  after 1.5-hour contact time is not  
171 efficient for completely removing SARS-CoV-2 viral RNA, and 800  $\text{g/m}^3$  dosage of  
172 sodium hypochlorite might be not enough to secure a complete disinfection of  
173 medical wastewaters, particularly for those from Fangcang, temporary or  
174 non-centralized hospitals. From the negative results of SARS-CoV-2 viral RNA  
175 (Table 1), the complete deactivation of SARS-CoV-2 was achieved when the dosage  
176 of sodium hypochlorite was 6700  $\text{g/m}^3$ . Nevertheless, it is an over-dosage and resulted  
177 in a significantly higher level of DPB residues in the effluents than other reports<sup>24</sup>.

178 They show high ecological risks and challenge the surrounding environment receiving  
179 disinfected medical wastewater. Additionally, applying high level of chlorine-based  
180 and other disinfectants have lasted for three months in Wuhan since the outbreak of  
181 COVID-19, and further studies are suggested to carefully evaluate its ecological risks.

182 Owing to the operational limitations during the COVID-19 outbreak in Wuhan and  
183 restricted sample transport to other laboratories, this study did not demonstrate viral  
184 viability after disinfection by viral culture. Additionally, disinfection operations in  
185 septic tanks of Wuchang Fangcang Hospital were strictly controlled by government  
186 officials that we could not collect more samples or explore the optimal dosage of  
187 sodium hypochlorite for complete removal of SARS-CoV-2 viral RNA with minimal  
188 DBPs. This work attempts to give initial information about the potential risks of viral  
189 spread and DBPs residues during disinfection processes for medical wastewater  
190 containing SARS-CoV-2, and further studies are required to confirm these preliminary  
191 results.

#### 192 **4. Conclusion**

193 Our study for the first time reported an unexpected presence of SARS-CoV-2 viral  
194 RNA in septic tanks after disinfection with  $800 \text{ g/m}^3$  of sodium hypochlorite and  
195 current disinfection guideline by WHO and China CDC might not secure a complete  
196 removal of SARS-CoV-2 in medical wastewater. SARS-CoV-2 might be embedded in  
197 patient's faeces, protected by organic matters from disinfection, and slowly release  
198 when free chlorine declines. Septic tanks in non-centralized disinfection system of  
199 Fancang hospitals or isolation points potentially behave as a secondary source  
200 spreading SARS-CoV-2 in drainage pipelines for prolonged time. Disinfection  
201 strategy is of great urgency to improve and the ecological risks of DBPs need to be  
202 carefully considered.

#### 203 **5. Author contributions**

204 Concept and design: DZ, XH, YL, JQ.

205 Acquisition, analysis, or interpretation of data: DZ, HL, JL, WL, CY, TZ, YJ, XZ, GL.

206 Drafting of the manuscript: DZ, YH, SD.

207 Statistical analysis: DZ.





## 209 References

- 210 1. Ralph, R.; Lew, J.; Zeng, T. S.; Francis, M.; Xue, B.; Roux, M.; Ostadgavahi, A.  
211 T.; Rubino, S.; Dawe, N. J.; Al-Ahdal, M. N.; Kelvin, D. J.; Richardson, C. D.;  
212 Kindrachuk, J.; Falzarano, D.; Kelvin, A. A., 2019-nCoV (Wuhan virus), a novel  
213 Coronavirus: human-to-human transmission, travel-related cases, and vaccine  
214 readiness. *Journal of Infection in Developing Countries* **2020**, *14* (1), 3-17.
- 215 2. Li, Q.; Guan, X.; Wu, P.; Wang, X.; Zhou, L.; Tong, Y.; Ren, R.; Leung, K. S. M.;  
216 Lau, E. H. Y.; Wong, J. Y.; Xing, X.; Xiang, N.; Wu, Y.; Li, C.; Chen, Q.; Li, D.; Liu,  
217 T.; Zhao, J.; Liu, M.; Tu, W.; Chen, C.; Jin, L.; Yang, R.; Wang, Q.; Zhou, S.; Wang,  
218 R.; Liu, H.; Luo, Y.; Liu, Y.; Shao, G.; Li, H.; Tao, Z.; Yang, Y.; Deng, Z.; Liu, B.; Ma,  
219 Z.; Zhang, Y.; Shi, G.; Lam, T. T. Y.; Wu, J. T.; Gao, G. F.; Cowling, B. J.; Yang, B.;  
220 Leung, G. M.; Feng, Z., Early Transmission Dynamics in Wuhan, China, of Novel  
221 Coronavirus-Infected Pneumonia. *New England Journal of Medicine* **2020**, *382* (13),  
222 1199-1207.
- 223 3. Lai, C.-C.; Shih, T.-P.; Ko, W.-C.; Tang, H.-J.; Hsueh, P.-R., Severe acute  
224 respiratory syndrome coronavirus 2 (SARS-CoV-2) and coronavirus disease-2019  
225 (COVID-19): The epidemic and the challenges. *Int. J. Antimicrob. Agents* **2020**, *55*  
226 (3), 105924.
- 227 4. Chan, J. F. W.; Yuan, S. F.; Kok, K. H.; To, K. K. W.; Chu, H.; Yang, J.; Xing, F.  
228 F.; Liu, J. L.; Yip, C. C. Y.; Poon, R. W. S.; Tsoi, H. W.; Lo, S. K. F.; Chan, K. H.;  
229 Poon, V. K. M.; Chan, W. M.; Ip, J. D.; Cai, J. P.; Cheng, V. C. C.; Chen, H. L.; Hui, C.  
230 K. M.; Yuen, K. Y., A familial cluster of pneumonia associated with the 2019 novel  
231 coronavirus indicating person-to-person transmission: a study of a family cluster.  
232 *Lancet* **2020**, *395* (10223), 514-523.
- 233 5. Poon, L. L. M.; Peiris, M., Emergence of a novel human coronavirus threatening  
234 human health. *Nat Med* **2020**, 1-2.
- 235 6. Chang, D.; Lin, M.; Wei, L.; Xie, L.; Zhu, G.; Dela Cruz, C. S.; Sharma, L.,  
236 Epidemiologic and Clinical Characteristics of Novel Coronavirus Infections Involving  
237 13 Patients Outside Wuhan, China. *JAMA* **2020**, *323* (11), 1092-1093.
- 238 7. Carlos, W. G.; Dela Cruz, C. S.; Cao, B.; Parnick, S.; Jamil, S., Novel Wuhan  
239 (2019-nCoV) Coronavirus. *American Journal of Respiratory and Critical Care*  
240 *Medicine* **2020**, *201* (4), P7-P8.
- 241 8. Wu, J.; Liu, J.; Zhao, X.; Liu, C.; Wang, W.; Wang, D.; Xu, W.; Zhang, C.; Yu, J.;  
242 Jiang, B.; Cao, H.; Li, L., Clinical Characteristics of Imported Cases of COVID-19 in  
243 Jiangsu Province: A Multicenter Descriptive Study. *Clinical Infectious Diseases* **2020**,  
244 ciaa199.
- 245 9. Holshue, M. L.; DeBolt, C.; Lindquist, S.; Lofy, K. H.; Wiesman, J.; Bruce, H.;  
246 Spitters, C.; Ericson, K.; Wilkerson, S.; Tural, A.; Diaz, G.; Cohn, A.; Fox, L.; Patel,  
247 A.; Gerber, S. I.; Kim, L.; Tong, S. X.; Lu, X. Y.; Lindstrom, S.; Pallansch, M. A.;  
248 Weldon, W. C.; Biggs, H. M.; Uyeki, T. M.; Pillai, S. K.; Washington State-nCoV, V. C.  
249 I., First Case of 2019 Novel Coronavirus in the United States. *New England Journal*  
250 *of Medicine* **2020**, *382* (10), 929-936.
- 251 10. Tian, Y.; Rong, L.; Nian, W.; He, Y., Review article: Gastrointestinal features in  
252 COVID-19 and the possibility of faecal transmission. *Alimentary Pharmacology &*

- 253 *Therapeutics* **2020**, doi: 10.1111/apt.15731.
- 254 11. Zhang, J.; Wang, S.; Xue, Y., Fecal specimen diagnosis 2019 Novel  
255 Coronavirus–Infected pneumonia. *Journal of Medical Virology* **2020**,  
256 <https://doi.org/10.1002/jmv.25742>.
- 257 12. Ling, Y.; Xu, S.-B.; Lin, Y.-X.; Tian, D.; Zhu, Z.-Q.; Dai, F.-H.; Wu, F.; Song,  
258 Z.-G.; Huang, W.; Chen, J.; Hu, B.-J.; Wang, S.; Mao, E.-Q.; Zhu, L.; Zhang, W.-H.;  
259 Lu, H.-Z., Persistence and clearance of viral RNA in 2019 novel coronavirus disease  
260 rehabilitation patients. *Chinese Medical Journal* **2020**, doi:  
261 10.1097/CM1099.0000000000000774.
- 262 13. Xing, Y.; Ni, W.; Wu, Q.; Li, W.; Li, G.; Tong, J.; Song, X.; Xing, Q., Prolonged  
263 presence of SARS-CoV-2 in feces of pediatric patients during the convalescent phase.  
264 *medRxiv* **2020**, 2020.2003.2011.20033159.
- 265 14. Xiao, F.; Tang, M.; Zheng, X.; Li, C.; He, J.; Hong, Z.; Huang, S.; Zhang, Z.; Lin,  
266 X.; Fang, Z.; Lai, R.; Chen, S.; Liu, J.; Huang, J.; Xia, J.; Li, Z.; Jiang, G.; Liu, Y.; Li,  
267 X.; Shan, H., Evidence for gastrointestinal infection of SARS-CoV-2. *medRxiv* **2020**,  
268 2020.2002.2017.20023721.
- 269 15. Walker, C. M.; Ko, G., Effect of ultraviolet germicidal irradiation on viral  
270 aerosols. *Environ Sci Technol* **2007**, *41* (15), 5460-5465.
- 271 16. Tseng, C. C.; Li, C. S., Inactivation of viruses on surfaces by ultraviolet  
272 germicidal irradiation. *Journal of Occupational and Environmental Hygiene* **2007**, *4*  
273 (6), 400-405.
- 274 17. Tseng, C.; Li, C., Inactivation of surface viruses by gaseous ozone. *Journal of*  
275 *Environmental Health* **2008**, *70* (10), 56-62.
- 276 18. Kampf, G.; Todt, D.; Pfaender, S.; Steinmann, E., Persistence of coronaviruses on  
277 inanimate surfaces and their inactivation with biocidal agents. *Journal Of Hospital*  
278 *Infection* **2020**, *104* (3), 246-251.
- 279 19. How, Z. T.; Kristiana, I.; Buseti, F.; Linge, K. L.; Joll, C. A., Organic  
280 chloramines in chlorine-based disinfected water systems: A critical review. *J Environ*  
281 *Sci-China* **2017**, *58*, 2-18.
- 282 20. Richardson, S. D.; Plewa, M. J.; Wagner, E. D.; Schoeny, R.; DeMarini, D. M.,  
283 Occurrence, genotoxicity, and carcinogenicity of regulated and emerging disinfection  
284 by-products in drinking water: A review and roadmap for research. *Mutation*  
285 *Research-Reviews In Mutation Research* **2007**, *636* (1-3), 178-242.
- 286 21. Bull, R. J.; Reckhow, D. A.; Li, X. F.; Humpage, A. R.; Joll, C.; Hrudey, S. E.,  
287 Potential carcinogenic hazards of non-regulated disinfection by-products:  
288 Haloquinones, halo-cyclopentene and cyclohexene derivatives, N-halamines,  
289 halonitriles, and heterocyclic amines. *Toxicology* **2011**, *286* (1-3), 1-19.
- 290 22. Wang, W.; Qian, Y. C.; Li, J. H.; Moe, B.; Huang, R. F.; Zhang, H. Q.; Hrudey, S.  
291 E.; Li, X. F., Analytical and Toxicity Characterization of  
292 Halo-hydroxyl-benzoquinones as Stable Halobenzoquinone Disinfection Byproducts  
293 in Treated Water. *Anal Chem* **2014**, *86* (10), 4982-4988.
- 294 23. Richardson, S. D., Disinfection By-Products: Formation and Occurrence in  
295 Drinking Water. *Encyclopedia of Environmental Health* **2011**, 110-136.
- 296 24. Luo, Y.; Feng, L.; Liu, Y.; Zhang, L., Disinfection by-products formation and

297 acute toxicity variation of hospital wastewater under different disinfection processes.  
298 *Sep Purif Technol* **2020**, 238, 116405.  
299 25. Ding, X. L.; Zhu, J. Y.; Zhang, J.; Dong, T. Y.; Xia, Y. K.; Jiao, J. D.; Wang, X. R.;  
300 Zhou, W. J., Developmental toxicity of disinfection by-product monohaloacetamides  
301 in embryo-larval stage of zebrafish. *Ecotox Environ Safe* **2020**, 189, 110037.  
302 26. Kozari, A.; Paloglou, A.; Voutsas, D., Formation potential of emerging disinfection  
303 by-products during ozonation and chlorination of sewage effluents. *Sci Total Environ*  
304 **2020**, 700, 134449.  
305 27. Zhai, H. Y.; Zhang, X. R.; Zhu, X. H.; Liu, J. Q.; Ji, M., Formation of Brominated  
306 Disinfection Byproducts during Chloramination of Drinking Water: New Polar  
307 Species and Overall Kinetics. *Environ Sci Technol* **2014**, 48 (5), 2579-2588.  
308 28. WHO *Water, sanitation, hygiene and waste management for COVID-19:*  
309 *technical brief*; 03 March, 2020.  
310 29. China-MEE, *Technical solution for emergency treatment of medical sewage*  
311 *contaminated by novel coronavirus*. . 2020.  
312 30. Templeton, M. R.; Andrews, R. C.; Hofmann, R., Inactivation of  
313 particle-associated viral surrogates by ultraviolet light. *Water Res* **2005**, 39 (15),  
314 3487-3500.  
315  
316
